# Supplementary material for: Ketamine’s rapid antidepressant effects are mediated by Ca2+-permeable AMPA receptors
Source: eLife. 2023 Jun 26;12:e86022. doi: 10.7554/eLife.86022 (PMC10319435; doi:10.7554/eLife.86022)
Supplement: Figure 4—source data 1. [file elife-86022-fig4-data1.xlsx]

## Sheet: Fig. 4a
Total Distance Travelled (m)					Time spent outside (s)					Time spent inside (s)
Saline	Ketamine	IEM 1460	Ketamine + IEM1460		Saline	Ketamine	IEM 1460	Ketamine + IEM1460		Saline	Ketamine	IEM 1460	Ketamine + IEM1460
51.73	44.75	11.59	16.06		1047.5	1029.6	1183.1	1179.2		152.5	170.4	16.9	20.8
33.27	40.76	32.03	35.16		1005.7	1073.2	1148	1124.2		194.3	126.8	52	75.8
13.59	50.25	37.06	49.29		1178.2	1018.9	1103.4	1075.1		21.8	181.1	96.6	124.9
46.66	58.19	48.84	18.59		1079	977.2	1093.2	1153.8		121	222.8	106.8	46.2
23.97	62.41	50.85	35.26		1114.9	930.6	1087.9	1102.2		85.1	269.4	112.1	97.8
26.62	57.44	15.67	31.48		1120	1036.2	1173	1137.4		80	163.8	27	62.6
33.204	70.82	13.382	44.796		1075.6	1086	1188.1	1091.4		124.4	114	11.9	108.6
11.804	45.216	22.791	48.389		1190.5	1016.6	1182.6	1104.6		9.5	183.4	17.4	95.4
41.049	41.166	28.685	27.665		1122.2	1032.1	1061.2	1151.8		77.8	167.9	138.8	48.2
37.614	43.026	33.601	36.142		1141.1	1073.2	1136.7	1147		58.9	126.8	63.3	53
53.075	37.951	44.105	30.765		1067.9	1097.5	1125.7	1128.9		132.1	102.5	74.3	71.1
50.785	43.991		36.355		1081.6	1050.3		1145.7		118.4	149.7		54.3
51.938	40.193		23.962		1074.3	1086		1119.7		125.7	114		80.3
46.658	35.126		29.045		1064.9	1102.3		1137.5		135.1	97.7		62.5
6.696	48.172				1196.7	1120				3.3	80

## Sheet: Fig. 4b
Total Distance Travelled (m)					Time spent outside (s)					Time spent inside (s)
Saline	Ketamine	IEM 1460	Ketamine + IEM1460		Saline	Ketamine	IEM 1460	Ketamine + IEM1460		Saline	Ketamine	IEM 1460	Ketamine + IEM1460
40.496	18.945	43.954	47.642		1090.1	1052.5	1072.2	1173.9		109.9	147.5	127.8	26.1
47.484	46.253	29.164	35.631		1130.3	996.1	1120.1	1038.2		69.7	203.9	79.9	161.8
25.607	41.848	41.184	37.218		1131.8	1035.8	1140.7	1106.4		68.2	164.2	59.3	93.6
34.24	56.801	14.58	22.043		1079.3	1105.3	1178	1137.8		120.7	94.7	22	62.2
32.376	32.47	37.643	51.479		1104.9	1033.7	1147.6	1134.2		95.1	166.3	52.4	65.8
40.441	50.965	28.517	27.023		1107.2	1108	1140.6	1149.7		92.8	92	59.4	50.3
37.621	28.778	57.136	21.598		1087.7	1119.6	1025.9	1128.9		112.3	80.4	174.1	71.1
40.995	32.485	28.551	53.822		1129.4	1112.8	1133.9	1142.2		70.6	87.2	66.1	57.8
31.019	39.009	27.592	29.761		1107	1124.5	1147.4	1151.5		93	75.5	52.6	48.5
50.554	37.749	58.509	40.989		1062.1	1136.5	1036.9	1042.4		137.9	63.5	163.1	157.6
24.853	48.275	56.397	40.042		1138.3	1044.7	1112.5	1145.1		61.7	155.3	87.5	54.9
43.907	44.749	32.428	21.105		1081.6	1081.4	1183.2	1155.5		118.4	118.6	16.8	44.5
62.207	48.488		37.012		1090.6	1061.3		1126.5		109.4	138.7		73.5
50.942	36.352		43.694		1097.1	1017		1076.6		102.9	183		123.4
52.833	65.864		30.829		1077.7	1109.9		1145.8		122.3	90.1		54.2
37.785	39.395		43.022		1150.7	1127.6		1089.4		49.3	72.4		110.6
57.656	31.278		55.89		1087.9	1004.4		1029.6		112.1	195.6		170.4
50.149	29.693				1110.4	963.5				89.6	236.5
	52.767					1049.5					150.5
	34.8					972.7					227.3

## Sheet: Fig. 4c
Total Distance Travelled (m)					Time spent outside (s)					Time spent inside (s)
Saline	Ketamine	IEM 1460	Ketamine + IEM1460		Saline	Ketamine	IEM 1460	Ketamine + IEM1460		Saline	Ketamine	IEM 1460	Ketamine + IEM1460
40.496	31.852	43.954	17.793		1090.1	1011.8	1072.2	1183.5		109.9	188.2	127.8	16.5
48.575	56.987	29.164	9.037		1009.9	1041.3	1120.1	1196.5		190.1	158.7	79.9	3.5
47.484	43.604	41.184	49.197		1130.3	1099.5	1140.7	1019		69.7	100.5	59.3	181
25.607	35.396	37.643	39.68		1131.8	1035.1	1147.6	1007.5		68.2	164.9	52.4	192.5
43.22	46.299	28.517	49.241		1049.8	1036.6	1140.6	1060.6		150.2	163.4	59.4	139.4
34.24	49.476	57.136	15.354		1079.3	944.6	1025.9	1165.6		120.7	255.4	174.1	34.4
32.376	40.72	28.551	17.024		1104.9	1037.9	1133.9	1171.7		95.1	162.1	66.1	28.3
40.441	53.557	27.592	37.634		1107.2	883.5	1147.4	1037.9		92.8	316.5	52.6	162.1
37.621		58.509	12.307		1087.7		1036.9	1188.5		112.3		163.1	11.5
40.995		56.397	8.784		1129.4		1112.5	1184.4		70.6		87.5	15.6
31.019		32.428			1107		1183.2			93		16.8
50.554					1062.1					137.9
24.853					1138.3					61.7
43.907					1081.6					118.4
62.207					1090.6					109.4
50.942					1097.1					102.9
52.833					1077.7					122.3
37.785					1150.7					49.3
57.656					1087.9					112.1
50.149					1110.4					89.6
