# Supplementary material for: Ketamine’s rapid antidepressant effects are mediated by Ca2+-permeable AMPA receptors
Source: eLife. 2023 Jun 26;12:e86022. doi: 10.7554/eLife.86022 (PMC10319435; doi:10.7554/eLife.86022)
Supplement: Figure 5—source data 1. [file elife-86022-fig5-data1.xlsx]

## Sheet: Fig. 5a
Saline	Ketamine	IEM 1460	Ketamine + IEM1460
192.8	186.3	223.2	160.6
148.4	148.6	221.6	204.8
217.3	161.7	140.7	140.1
172.6	191.3	210.9	254.4
216.3	157.6	211.1	269
213.7	153.9	183.4	120.2
147.2	91.5	235.2	182.1
211.9	142.8	188.7	222.9
237.5	120.4	244.4	154.7
165.2	166		168.3
242.8	167.5		238.7
212.5	134.9		225.4
	173.9

## Sheet: Fig. 5b
Saline	Ketamine	IEM 1460	Ketamine + IEM1460
189.5	149.8	183.4	62.6
156	231.4	235.2	120.2
173.6	162.4	101.1	182.1
121.9	214	188.7	222.9
193.7	100.5	92.5	154.7
210.6	279.7	244.4	168.3
242.8	247.8	196.9	238.7
104.7	134.9	188	225.4
100.2	207.8		146.4
212.5	209.7		178.9
	173.9		298.1
	197.3		203.9

## Sheet: Fig. 5c
Saline	Ketamine	IEM 1460	Ketamine + IEM1460
189.5	143.6	183.4	269.3
156	38.6	235.2	137.6
173.6	148.8	188.7	150.4
193.7	138.3	244.4	284.7
210.6	137.2	255.4	176.9
242.8	117.7	220.4	115.8
214.9	220.7	196.9	229.6
268.4	208.1	188	142.5
265.6	104.7		260.8
212.5	100.2		264.1
	75.1
