# Supplementary material for: Ketamine’s rapid antidepressant effects are mediated by Ca2+-permeable AMPA receptors
Source: eLife. 2023 Jun 26;12:e86022. doi: 10.7554/eLife.86022 (PMC10319435; doi:10.7554/eLife.86022)
Supplement: Figure 6—source data 1. [file elife-86022-fig6-data1.xlsx]

## Sheet: Fig. 6a
Saline	Ketamine
1.25317	1.2567
0.56548	1.22685
0.896581	0.568493
0.559183	0.782326
1.12736	0.930301
1.54179	0.882946
0.47745	0.217466
0.82911	0.316546
1.05792	0.563934
0.361043	0.68699
2.30109	0.198366
0.568402	0.979965
0.787713	0.753206
0.549707	0.744428
0.642474	1.10842
0.909027	0.789528
1.06403	0.776479
1.09845	0.639867
0.53915	1.0029
0.838981	0.731417
0.748399	1.09847
0.877185	0.814896
0.785168	1.1155
0.956458	0.531306
0.802237	1.27556
0.985211	1.05349
0.988401	1.20882
1.05173	1.04242
1.10752	1.12752
1.44223	0.925512
1.44767	0.712695
0.823266	0.611059
0.991596	1.01463
0.615168	1.21658
0.466501	1.00606
1.06478	0.993708
0.662804	1.27304
0.918951	0.733192
0.81565	0.908127
0.512855	1.11849
1.31789	0.354397
1.75619	1.18677
0.885412	0.90692
0.696103	0.482359
0.950016	0.524884
2.04694	0.40344
0.911958	0.899485
1.07257	0.138958
1.08483	0.337731
0.898791	1.25864
0.954599	1.47914
1.07576	1.05187
0.91489	1.04389
0.730206	0.695389
0.710687	0.851112
0.754604
1.51052
1.75889
0.958071
1.22621
0.896478
1.24394
1.33072
0.636817
0.946952
0.709612
2.0914
0.648105
1.38188
1.32526
1.44049
1.20267
0.894988
1.00365

## Sheet: Fig. 6b
Saline	Ketamine
0.8212	0.825922
0.433201	0.775276
0.80002	0.881159
0.78936	0.751031
0.58684	0.721994
1.31978	0.663145
0.763999	0.853872
0.728058	0.989153
0.699691	0.833499
0.650651	0.790977
0.718306	0.453646
0.693739	1.0122
1.05284	1.44498
1.15716	1.00598
0.675158	1.22417
2.00676	1.35172
1.76332	1.77036
1.12799	1.0422
0.742042	0.762767
2.0008	0.797302
1.14615	0.85834
1.8777	0.595345
1.58905	0.813239
1.44107	0.829348
0.705129	0.13677
0.915298	0.729192
0.702477	0.864292
0.845054	1.21398
0.83797	0.571822
0.921456	1.15159
0.83038	1.04058
1.00562	1.44725
0.793692	1.51407
1.05332	1.25181
0.832257	1.17203
0.644844	1.39914
0.8212	1.39661
0.433201	1.04865
0.80002	0.900982
0.58684	1.39803
0.78936	0.916848
1.31978	0.835987
0.763999	0.743831
0.728058	0.729132
0.699691	0.443734
0.718306	0.839874
0.693739	0.137707
0.650651	0.401468
1.15716	0.300435
1.05284	0.07599
2.00676	0.396864
1.76332	0.980862
0.675158	1.07385
1.12799	1.0853
0.742042	1.024
2.0008	0.870237
1.14615	1.12696
0.705129	1.16038
1.44107	1.40464
1.58905	0.703191
0.915298	0.711744
	0.614186
	0.733138
	1.01434
	0.533842
	0.560727
	0.479529
	0.460079
	1.45012
	1.01314
	1.08245
	1.19487
	0.598431
	0.61871
	0.970987
	0.574709
	0.639873
	0.771002
	0.856224
	0.82006
	0.654164
	0.216494
	0.558151
	1.00262
	0.887217
	0.817877
	1.00121
	1.08457
	0.812129
	0.860502
	1.18417
	1.22362
	0.515576
	0.868793
	0.908805
	0.628623
	0.560545
	0.386547
	0.304753
	0.627837
	0.334184
	0.671836
	0.112449
	0.424428
	0.33064
	1.38563
	0.962587
	0.992879
	0.955637
	0.267235
	1.09002
	0.6144
	0.544054
	0.634835
	0.443445
	0.456143
	0.818397
	0.445332
	0.785827
	0.23446
	0.123199
	0.643411
	0.58431
	0.724093
	0.598965
	1.29725
	0.943543
	1.08417
	0.508217
	1.21349
