# Supplementary material for: Ketamine’s rapid antidepressant effects are mediated by Ca2+-permeable AMPA receptors
Source: eLife journal article supplement (doi:10.7554/elife.86022), 2023-06-26
Supplement: supp [file Figure 1 - Source Data 1.xlsx]

## Sheet: Fig. 1a
GluA1	GluA2	CTRL
1.50467	1.38974	1
2.41937	0.53542	1
1.46209	0.348014	1
1.39787	1.27624	1
1.36389	0.676197	1
1.29051	0.974354	1
0.991447	1.63755	1
2.1247	1.24143	1
1.2449	1.40757	1
2.63641	1.00553	1
1.1401	1.83863	1

## Sheet: Fig. 1b
pS831	pS845	CTRL
1.08014	1.07458	1
2.46016	1.59895	1
1.97516	3.36659	1
2.16924	3.49809	1
2.28335	1.83496	1
1.83156	3.02199	1

## Sheet: Fig. 1c
CTRL	1 μM Ketamine	10 μM Ketamine	20 μM Ketamine
0.752473	1.17352	0.339497	0
0.87104	1.1955	0.266238	0
0.545219	1.31523	0.216543	0
0.92775	0.840405	0.127288	0
0.627046	0.706068	0.308306	0
0.565608	0.967293	0.0402196	0
0.425169	0.831629	0.0539873	0
0.849586	1.37438	0.0275829	0
0.319465	1.14922	0.0516495	0
0.522163	1.47437	0.0178073	0
1.75893	0.76653	0.114962	0
0.722318	0.0591917	0.0372698	0
1.14355	0.91168	0.0286127	0
1.22287	0.619403	0.1135	0
0.581269	0.615697	0.0226139	0
0.885265	0.262653	0	0
0.682646	0.156564	0.0112135	0
0.514724	0.87352	0.0604366	0
0.525255	0.755859	0.0043385	0
1.24334	0.180561	0	0
0.577868	1.17072	0.0121018	0
0.529586	0.920537	0	0
0.619059	1.06202	0	0
0.537188	1.30928	0	0
1.21319	1.18137	0.00474054	0
1.17222	0.190155	0	0
0.493176	1.16314	0
1.34463	1.00461
1.13856	0.837556
1.17005	0.874871
0.846351	1.30153
1.81734	1.03543
1.21088	0.467977
1.217	1.20566
1.86595	0.584831
1.45547	0.697812
1.69771	0.979436
1.74391	0.70934
1.47286	1.02658
1.28961	0.868811
0.589382	0.414915
1.20817	1.20879
0.924245	0.767774
1.72277	0.173019
1.15957	0.643307
1.29758	0.598357
	0.173376
	0.698286
	0.664073

## Sheet: Fig. 1d
CTRL	FK506	Ketamine
1.16032	0.909996	0.882004
1.10928	0.873326	0.891455
1.23811	0.887459	0.990298
1.17869	0.778885	0.966536
1.33267	0.864509	1.00222
0.846336	0.873326	0.904417
0.940529	0.887459	0.90697
0.87437	0.778885	0.937036
0.895818	0.864509	0.975461
0.883459	0.82623	0.955017
0.875166	0.920594	0.955243
1.03754	0.347154	0.994291
1.02893	0.671893	0.976717
0.924383	0.581778	0.850519
1.15322	0.65177	0.882796
1.08947	0.922379	1.06699
1.14221	0.851342	0.83248
1.06682	0.754092	0.949153
0.965178	0.844802	0.949094
0.923683	1.03418	0.978792
0.975895		0.917543
0.957973		0.923097
1.0337		0.909772
0.927242		0.880204
0.992171		0.911836
0.9913		0.90473
1.13011		0.974211
1.05524		0.942804
0.892236		0.861588
0.925094		0.987982
0.992155		0.86793
1.03368		0.991673
1.02987		0.959182
0.887229		1.01679
0.915108		0.974934
0.921801		0.950964
0.875315		1.01564
0.994264		0.943355
0.883275		0.98194
0.904366		1.0099
0.944431		0.896769
1.04345		0.914462
0.97018		0.905191
1.04128		0.965394
0.9902
0.974493
1.05175
