# Supplementary material for: Ketamine’s rapid antidepressant effects are mediated by Ca2+-permeable AMPA receptors
Source: eLife journal article supplement (doi:10.7554/elife.86022), 2023-06-26
Supplement: supp [file Figure 2 -Source Data 1.xlsx]

## Sheet: Fig. 2a
CTRL	NASPM	Ketamine	Ketamine + NASPM
0.791338	0.849329	1.50413	1.45595
1.1378	0.607246	1.66727	1.78903
1.05822	0.651716	1.29157	1.31147
0.876632	0.344932	1.58232	1.55658
1.34293	0.751004	1.78214	1.72895
0.86627	0.980443	1.91398	1.52289
0.729034	1.71196	0.868916	1.22782
0.945464	1.10534	1.4549	0.796815
1.16246	1.45809	1.52343	0.809846
1.15236	0.96697	1.54085	0.857184
1.09811	1.78905	1.63562	0.800778
1.03414	1.03287	0.687036	1.27129
1.25311	1.39747	1.57825	0.75044
0.373101	1.79002	1.38543	1.022
0.918033	1.13584	1.47708	0.926218
1.5035	0.653309	1.33111	0.853288
0.877383	1.0905	1.09201	0.408538
0.936803	0.922314	1.05974	1.24641
1.10031	0.445396	0.707159	0.478632
1.16692	0.840201	0.606138	0.224327
0.551027	0.813244	1.16433	0.117049
0.856589	0.771057	0.936995
1.38791	0.945586	1.03915
0.903448	1.01534	1.8745
0.888515	0.95976	1.39345
1.33096	0.870243	1.1946
1.0362	0.696459	1.31707
1.28635	0.653006	1.35735
1.49518	1.13272	1.71515
1.11952	0.830815	1.28154
0.767682	0.921483	0.986237
0.519793	0.757436	1.2719
0.532911		1.25071
		0.716567
		1.31834
		1.19451
		0.992087

## Sheet: Fig. 2b
cLTP	cLTP (naspm)	Ket+cLTP	Ket+cLTP (naspm)	CTRL
3.25457	1.97516	13.4648	2.12939	1
2.48112	1.66768	19.875	5.12993	1
3.81011	6.30025	7.82819	3.36659	1
5.01219	5.67463	6.40908	2.46016	1
3.50221	1.68127	6.96905	4.82023	1
2.38292	3.56426	4.40772	4.61064	1
2.43766	1.80798	4.59608	0.871757	1
7.48125	8.11023	9.28479	4.54381	1
2.38397	0.726036	5.22074	4.77797	1
6.0483	5.32989	11.7262	13.2094	1

## Sheet: Fig. 2c
cLTP	cLTP (naspm)	Ket+cLTP	Ket+cLTP (naspm)	CTRL
7.12953	1.53234	15.1862	5.57136	1
8.61412	4.90659	19.443	8.27549	1
3.09925	4.87775	6.98978	1.28586	1
5.01219	5.67463	7.94504	5.50175	1
2.82234	1.35683	4.88665	3.05381	1
3.19699	5.31676	6.96905	3.36659	1
2.58342	1.36339	6.82615	0.534974	1
6.17806	7.27722	6.87341	4.13891	1
2.98813	0.769448	19.3188	5.40194	1
4.95736	4.16601	22.8255	11.7657	1
