# Supplementary material for: Ketamine’s rapid antidepressant effects are mediated by Ca2+-permeable AMPA receptors
Source: eLife journal article supplement (doi:10.7554/elife.86022), 2023-06-26
Supplement: supp [file Figure 3 -Source Data 1.xlsx]

## Sheet: Fig. 3a
GluA1	GluA2	pS831	pS845	CTRL
1.74866	0.752556	2.70887	1.47613	1
3.42264	1.51894	1.35307	1.81133	1
2.19177	1.75327	1.45162	1.48482	1
1.26738	0.752747	1.26597	1.38725	1
1.25398	0.874687	1.54377	1.75893	1
1.72692	1.17463	1.49468	1.10877	1
1.94792	0.745928	1.55277	1.33358	1
2.89734	1.13208			1

## Sheet: Fig. 3b
GluA1	GluA2	pS831	pS845	CTRL
1.04988	0.874559	1.38314	1.02717	1
1.37627	0.621436	4.33417	1.76001	1
2.02294	0.862022	3.31116	1.07404	1
1.02676	0.589257	1.39061	3.58566	1
1.30267	1.08556	1.17165	3.23281	1
1.42758	1.34877	1.31804	3.2974	1
1.36438	1.06383			1
1.28189	1.20804			1
2.094	1.15881			1
1.25174	0.71141			1

## Sheet: Fig. 3c
GluA1	GluA2	pS831	pS845	CTRL
1.19498	1.15164	1.53985	1.29791	1
1.22184	0.983519	1.10608	1.09717	1
1.12944	1.29917	1.25841	1.32378	1
1.14901	1.09593	1.35507	1.31836	1
1.19814	1.08977	1.13223	1.67436	1
1.42376	1.34692	0.696843	0.974077	1
0.978885	1.11031	2.01805	2.32334	1
2.00067	1.96902	1.20774	1.02245	1
1.18959	1.57844	1.28961	1.11736	1
1.24665	1.56849	1.55277	1.49356	1
0.776495	1.87534	1.29416	2.08323	1
1.09585	1.29287	1.10553	1.00052	1
1.7288	1.57844			1
0.804836	1.56849			1
